# Supplementary material
Source: publisher figshare collection journal article supplement (https://sage.figshare.com/ndownloader/files/15069794)

## Consort Flow Chart

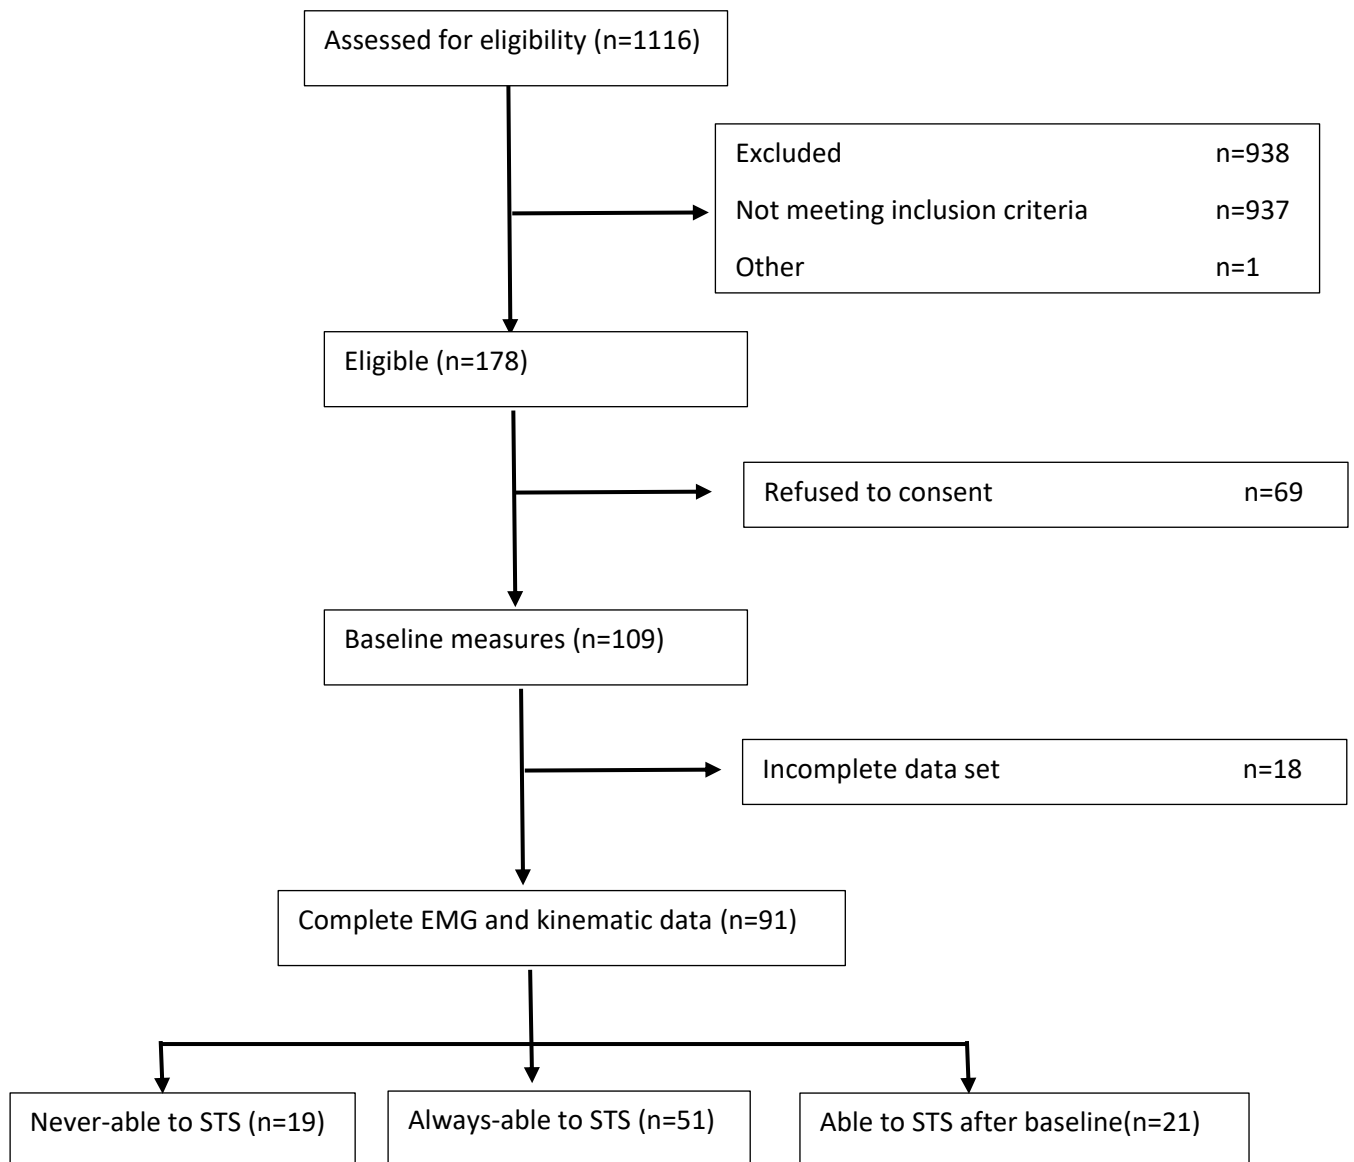

Supplement: Supplementary file 1 [file 15069794]
